# Supplementary material for: Fabrication of pH- and temperature-directed supramolecular materials from 1D fibers to exclusively 2D planar structures using an ionic self-assembly approach
Source: Royal Society of Chemistry journal article supplement (doi:10.1039/c5tc00044k), 2015-01-01
Supplement: c5tc00044k1.pdf [file c5tc00044k1.pdf]

## Supporting Information for

# Fabrication of pH- and temperature-directed supramolecular materials from 1D fiber to exclusively 2D planar structure by an ionic self-assembly approach

YanJun Gong<sup>a</sup>, Qiongzheng Hu<sup>b</sup>, Ni Cheng<sup>a</sup>, Tao Wang<sup>c</sup>, Wenwen Xu<sup>a</sup>, Yanhui Bi<sup>a</sup>, Li Yu<sup>a\*</sup>

<sup>a</sup>Key Laboratory of Colloid and Interface Chemistry, Shandong University, Ministry of Education, Jinan 250100,  
PR China.

<sup>b</sup> Department of Chemistry, University of Houston, Houston 77204, United States.

<sup>c</sup> Production Technology Institute, Shengli Oilfield, Dongying, 257000, PR China.

## Contents

**Fig.S1** AFM images of CR/[N-C<sub>10</sub>, N'-COOH-Im]Br supramolecular nanofibers formed in pH 3.2 aqueous solution at room temperature: high magnification (a) and phase image (b).

**Fig. S2** Time-dependent UV/Vis absorption spectra of CR/[N-C<sub>10</sub>, N'-COOH-Im]Br complex (molar ratio=1:2) formed in pH3.2 aqueous solution ( 0 h to 24 h) .

**Fig. S3** <sup>1</sup>H NMR spectra of CR/[N-C<sub>10</sub>, N'-COOH-Im] Br (molar ratio=1:2) supramolecular structures formed in pH3.2 aqueous solution.

**Fig.S4** FTIR spectrum of CR and CR/[N-C<sub>10</sub>, N'-COOH-Im]Br complex (molar ratio=1:2).

**Fig. S5** UV-Vis spectra of CR and CR/[N-C<sub>10</sub>, N'-COOH-Im]Br complex (molar ratio=1:2) at pH 3.2 and room temperature.

**Fig.S6** SAXS pattern of CR/[N-C<sub>10</sub>, N'-COOH-Im]Br complex (molar ratio=1:2) .

**Fig. S7** Optimized structures of (a) CR and (b) [N-C<sub>10</sub>, N'-COOH-Im]Br

**Fig. S8** TEM image of CR/[N-C<sub>12</sub>, N'-COOH-Im]Br complex (molar ratio=1:2) in pH

3.2 aqueous solution at room temperature.

**Fig. S9** ωB97X-D/6-31G(d,p) optimized geometries of dimer (C2) between CRs and four counters.

**Fig. S10** PM7 optimized geometries of dimer (C2) between six CRs and twelve counters.

**Fig. S11** TEM image of CR/[N-C<sub>10</sub>, N'-COOH-Im]Br assembled materials (molar ratio=1:2) at room temperature in the aqueous solutions with pH 3.5 (a), 3.8 (b)

**Fig. S12** POM images of CR/[N-C<sub>10</sub>, N'-COOH-Im]Br complex (molar ratio=1:2) at room temperature in the aqueous solution with different pH: 5.8 (a), 9.0 (b).

**Fig. S13** TEM image of CR/[N-C<sub>10</sub>, N'-COOH-Im]Br assembled materials (molar ratio=1:2) reversed at pH 3.2.

**Fig. S14** <sup>1</sup>H NMR spectra of CR/[N-C<sub>10</sub>, N'-COOH-Im] Br supramolecular structures (molar ratio=1:2) formed in pH5.8 aqueous solution.

**Fig. S15** <sup>1</sup>H NMR spectra of CR/[N-C<sub>10</sub>, N'-COOH-Im] Br supramolecular structures (molar ratio=1:2) formed in pH9.0 aqueous solution.

**Fig. S16** ωB97X-D/6-31G(d,p) optimized geometries of dimer (C2) between CRs and two counters.

**Fig. S17** <sup>1</sup>H NMR spectra of CR/[N-C<sub>10</sub>, N'-COOH-Im] Br supramolecular structures (molar ratio=1:2) at room temperature in the aqueous solution at pH 5.8(a) and pH 9.0 (b).

**Fig. S18** ωB97X-D/6-31G(d,p) optimized geometry of dimer (C2) between CRs and two counters in pH=9.0

**Fig. S19** pH-dependent fluorescence spectra of CR/[N-C<sub>10</sub>, N'-COOH-Im]Br complex in pH=3.2 and 9.0.

**Fig. S20** Temperature-dependent UV-Vis spectra of CR/[N-C<sub>10</sub>, N'-COOH-Im]Br complex (molar ratio=1:2) in pH 3.2 aqueous solution.

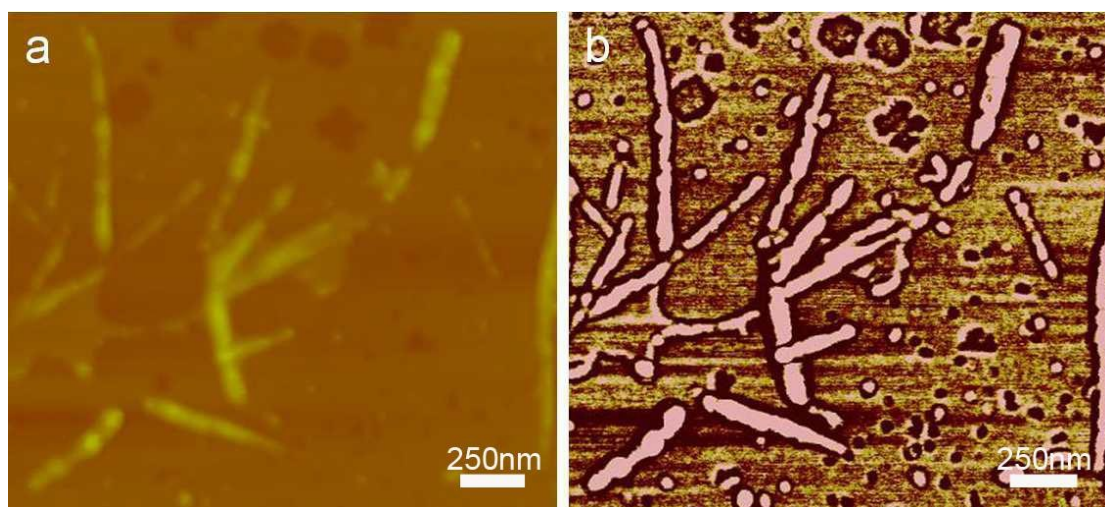

**Fig.S1** AFM images of CR/[N-C<sub>10</sub>, N'-COOH-Im]Br supramolecular nanofibers formed in pH 3.2 aqueous solution at room temperature: high magnification (a) and phase image (b).

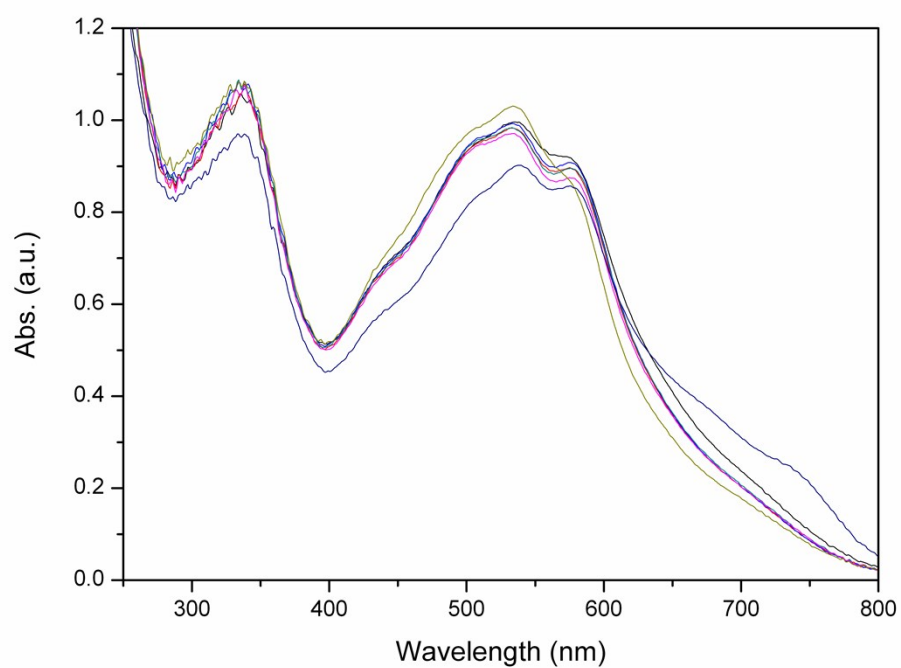

**Fig. S2** Time-dependent UV/Vis absorption spectra of CR/[N-C<sub>10</sub>, N'-COOH-Im]Br complex (molar ratio=1:2) formed in pH3.2 aqueous solution ( 0 h to 24 h ) .

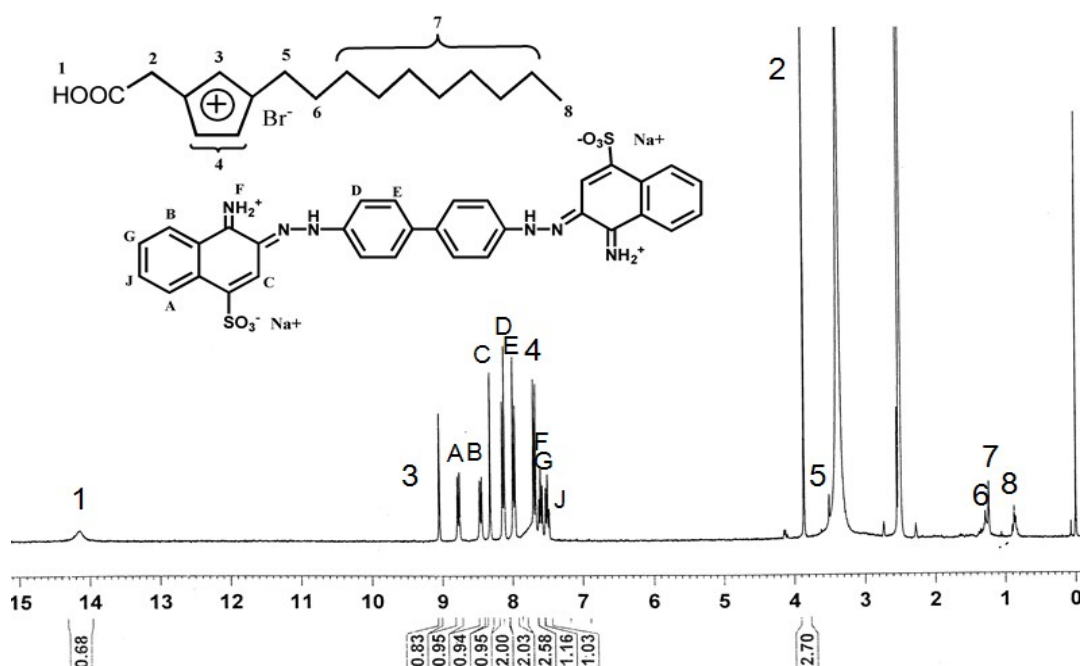

**Fig. S3** <sup>1</sup>H NMR spectra of CR/[N-C<sub>10</sub>, N'-COOH-Im] Br supramolecular structures (molar ratio=1:2) formed in pH3.2 aqueous solution.

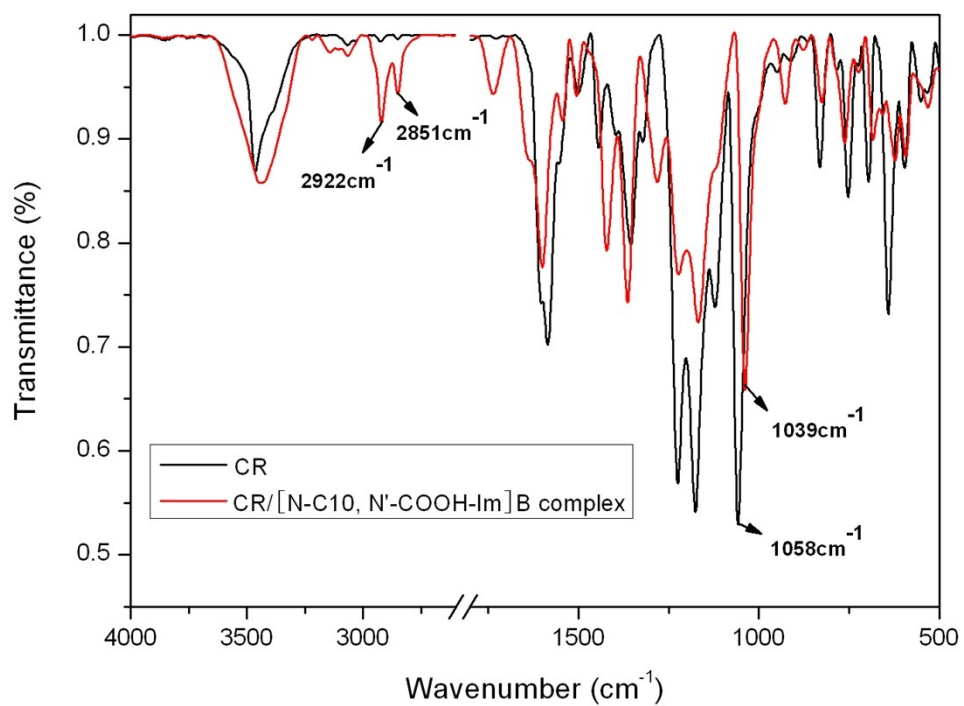

**Fig.S4** FTIR spectrum of CR and CR/[N-C<sub>10</sub>, N'-COOH-Im]Br complex (molar ratio=1:2).

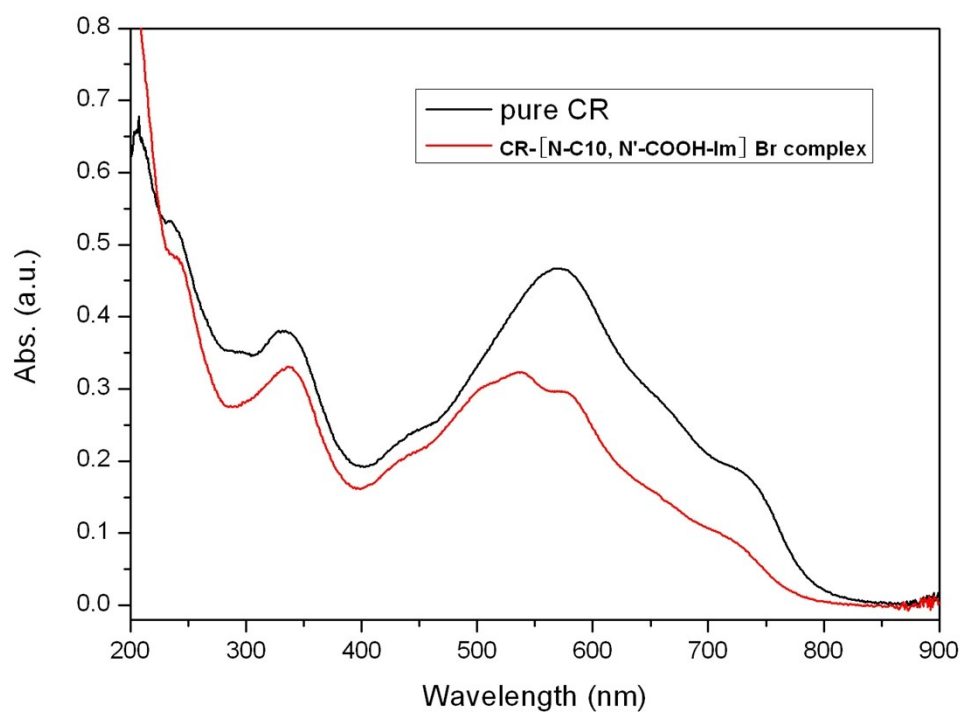

**Fig. S5** UV-Vis spectra of CR and CR/[N-C<sub>10</sub>, N'-COOH-Im]Br complex

(molar ratio=1:2) in pH 3.2 aqueous solution at room temperature.

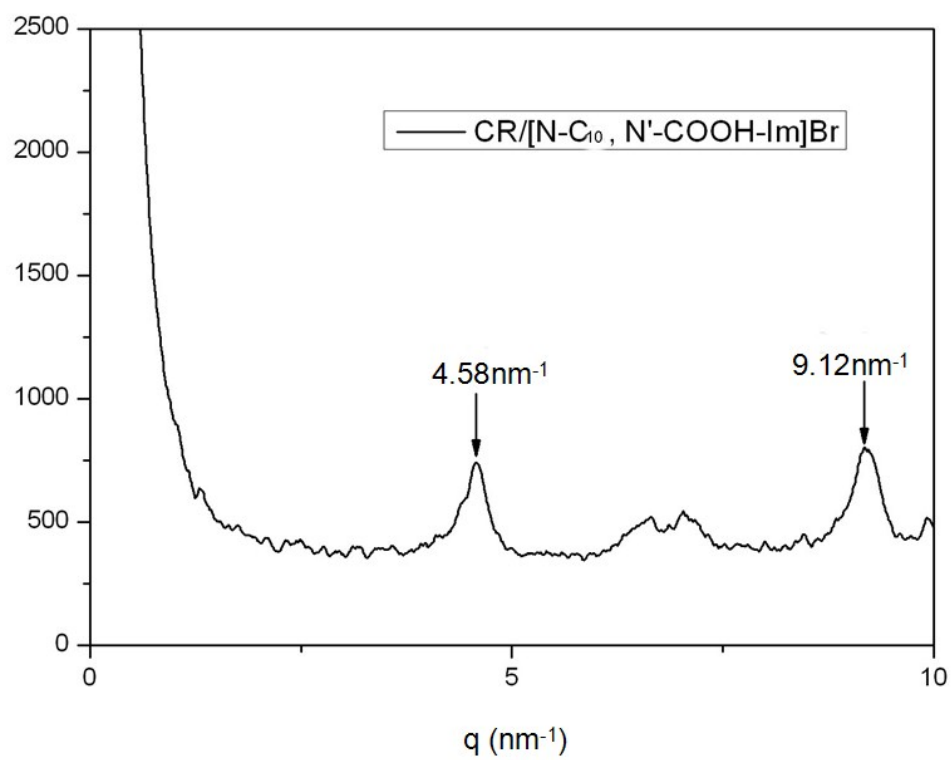

**Fig.S6** SAXS pattern of CR/[N-C<sub>10</sub>, N'-COOH-Im]Br complex (molar ratio=1:2).

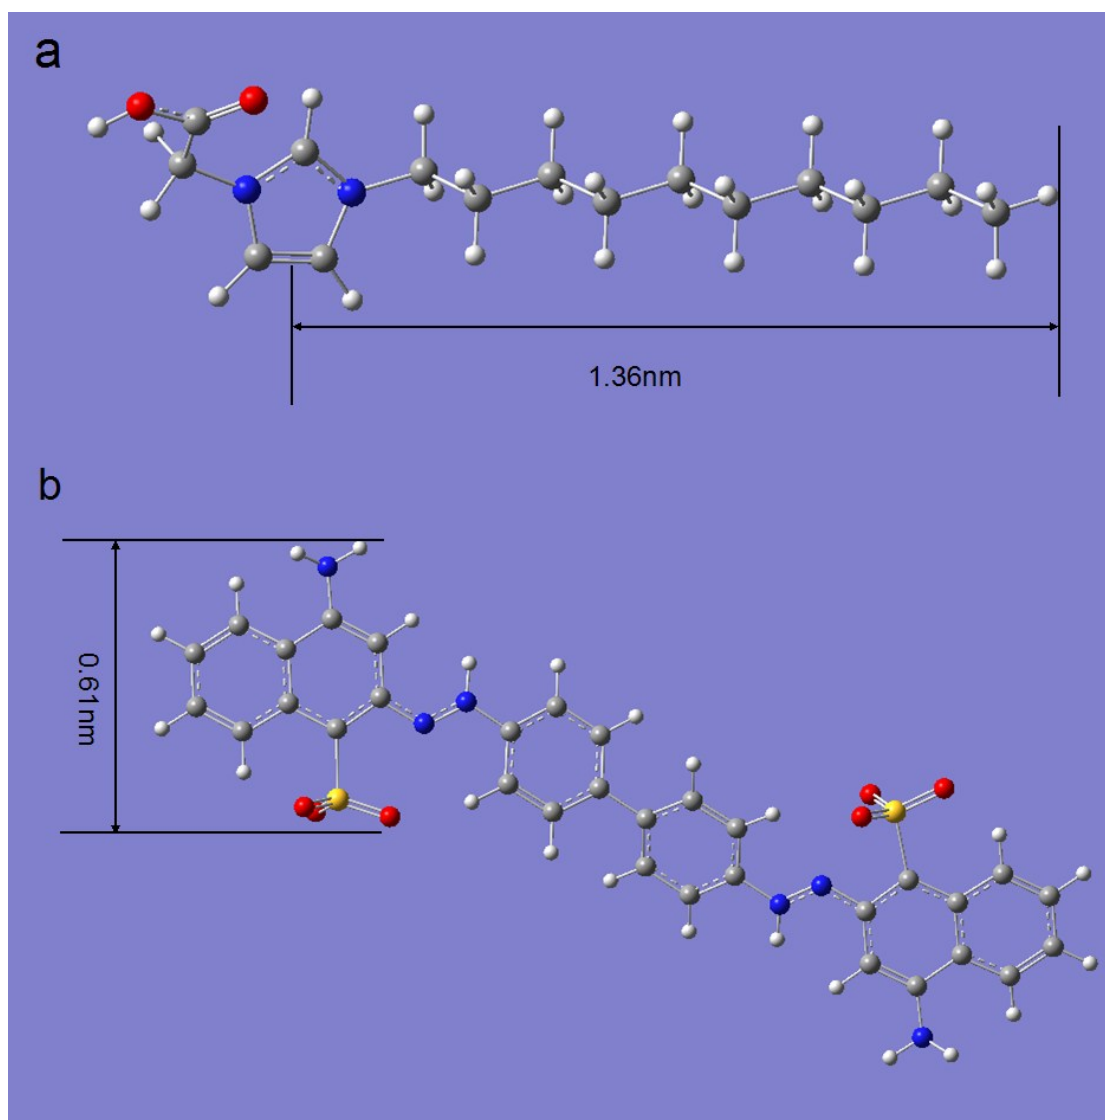

**Fig. S7** Optimized structures of [N-C<sub>10</sub>, N'-COOH-Im]Br (a) and CR (b).

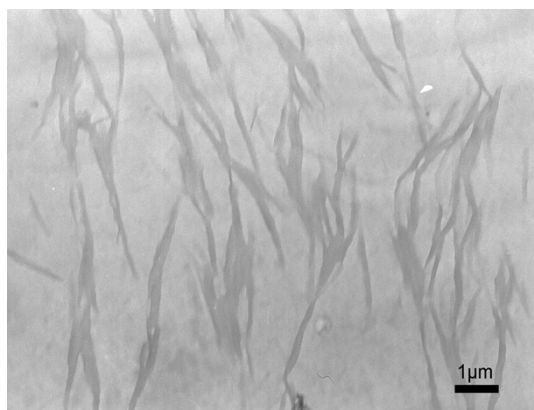

**Fig. S8** TEM image of CR/[N-C<sub>12</sub>, N'-COOH-Im]Br complex (molar ratio=1:2) in pH 3.2 aqueous solution at room temperature.

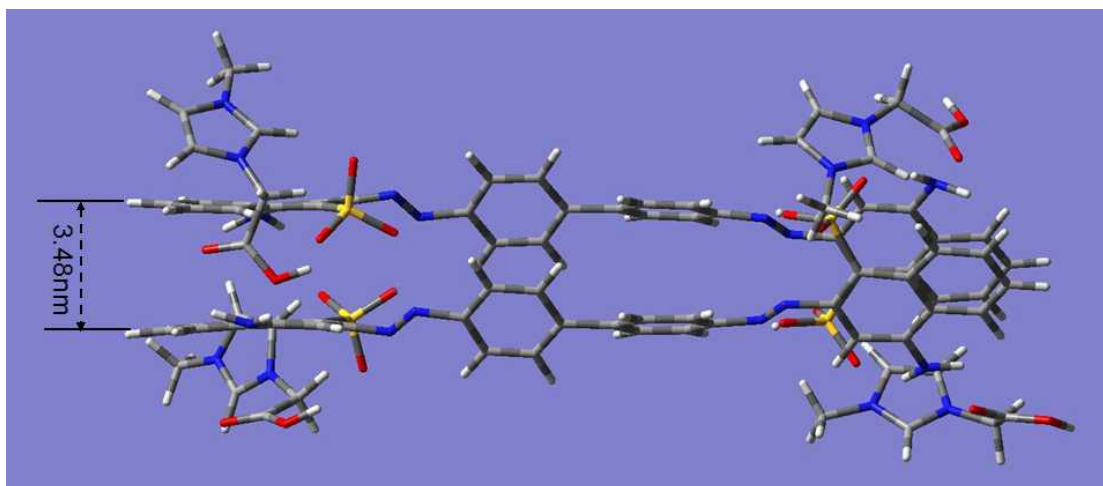

**Fig. S9**  $\omega$ B97X-D/6-31G(d,p) optimized geometries of dimer (C2) between CRs and four counters.

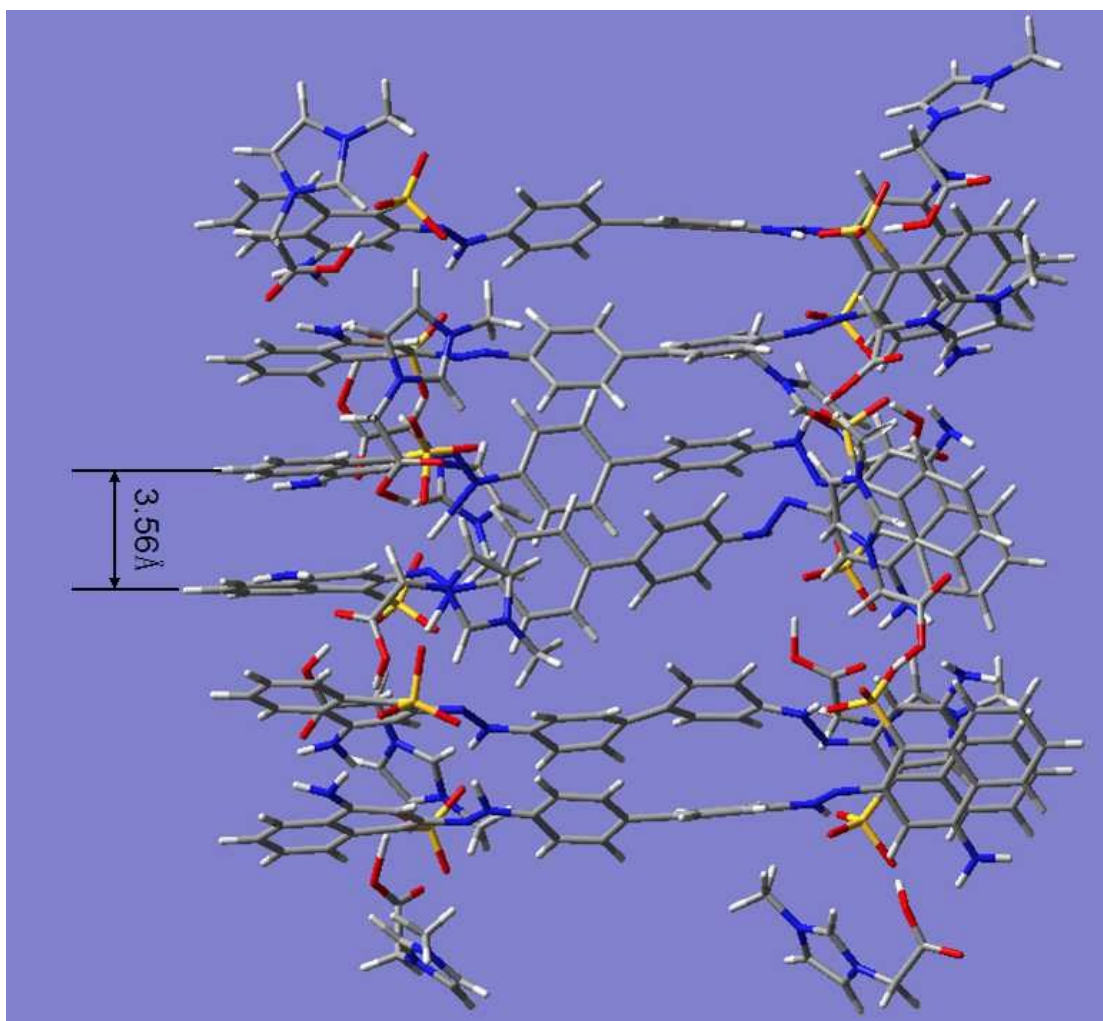

**Fig. S10** PM7 optimized geometries of dimer (C2) between six CRs and twelve counters.

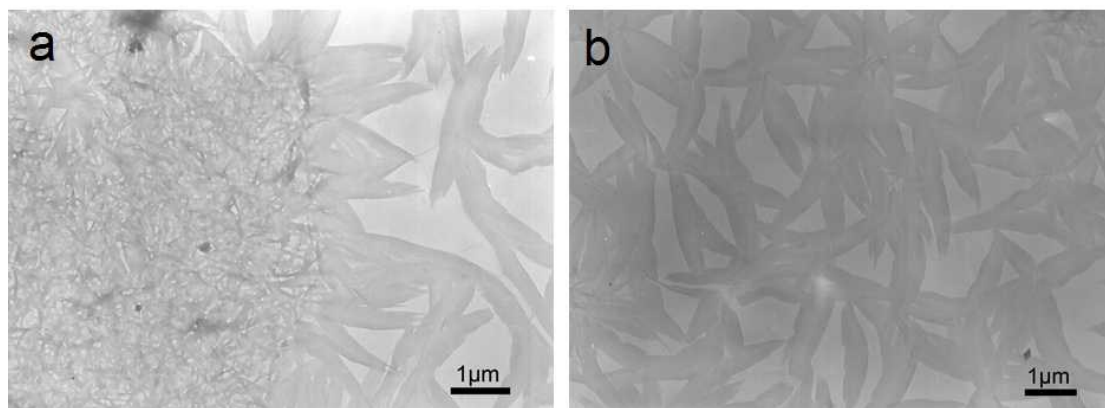

**Fig. S11** TEM image of CR/[N-C<sub>10</sub>, N'-COOH-Im]Br assembled materials at room temperature in the aqueous solutions with different pH: 3.5 (a), 3.8 (b)

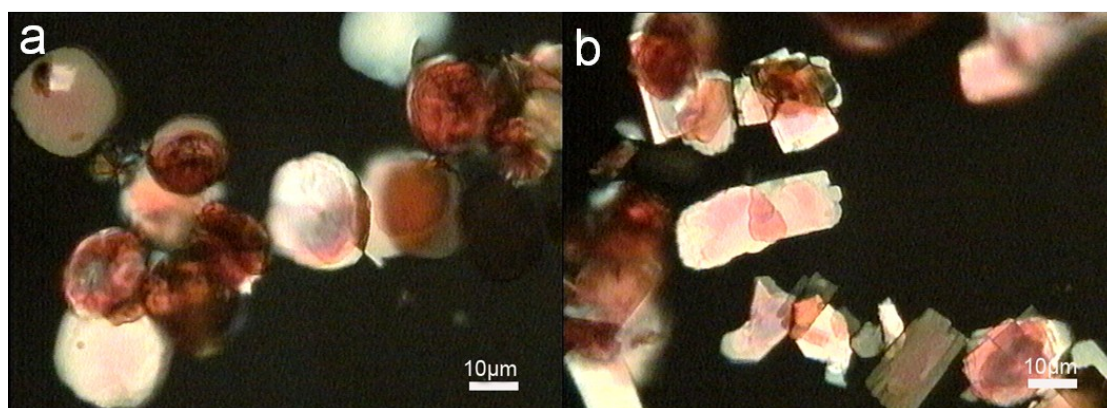

**Fig. S12** POM images of CR/[N-C<sub>10</sub>, N'-COOH-Im]Br complex (molar ratio=1:2) at room temperature in the aqueous solution with different pH: 5.8 (a), 9.0 (b).

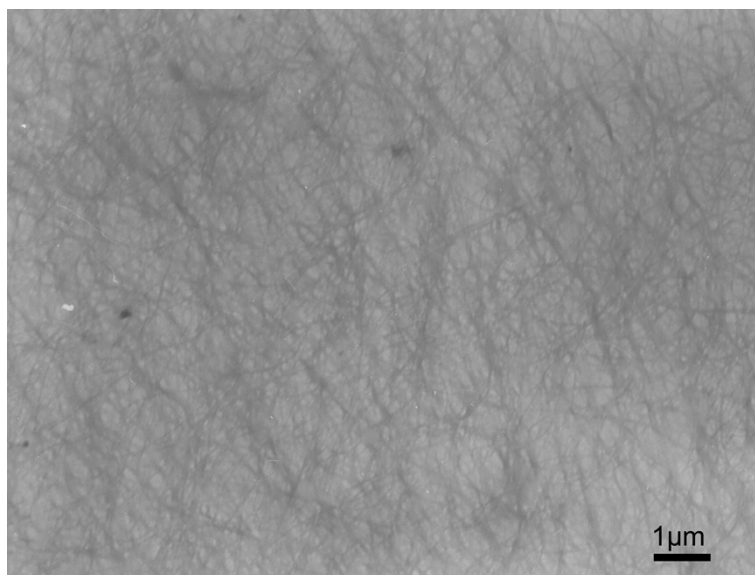

**Fig. S13** TEM image of CR/[N-C<sub>10</sub>, N'-COOH-Im]Br assembled materials reversed at pH 3.2.

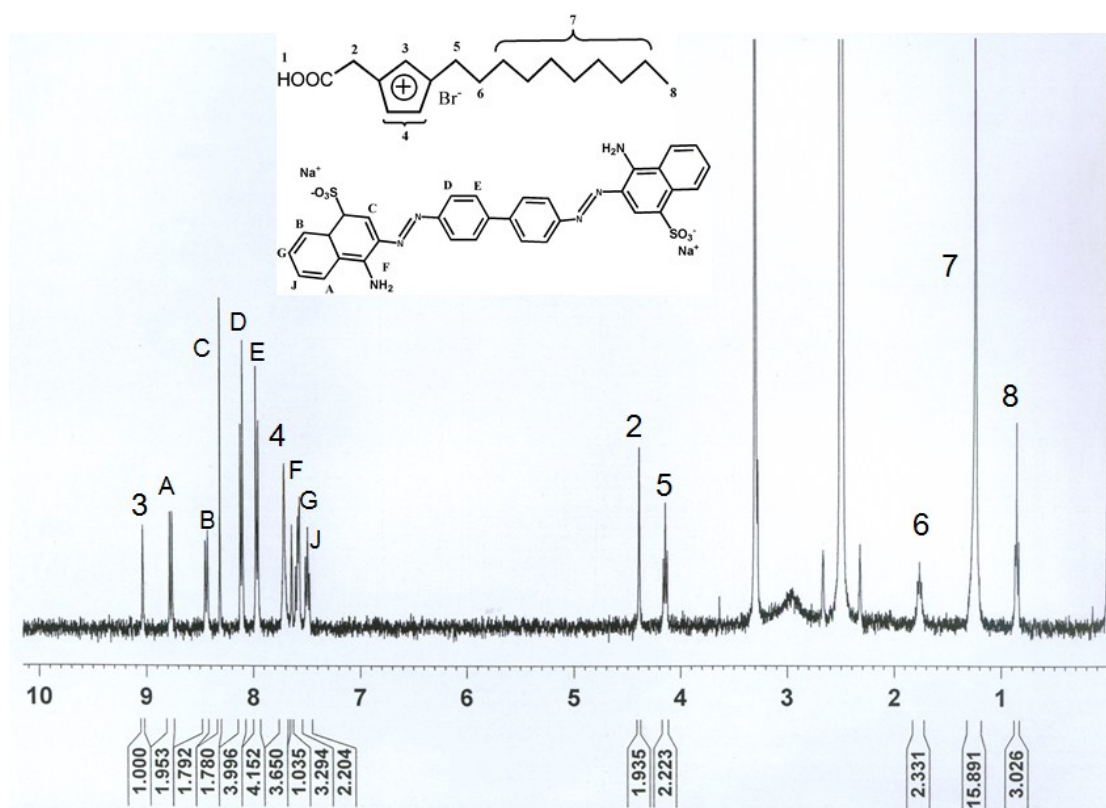

**Fig. S14**  $^1\text{H}$  NMR spectra of CR/[N-C<sub>10</sub>, N'-COOH-Im] Br supramolecular structures formed in pH 5.8 aqueous solution.



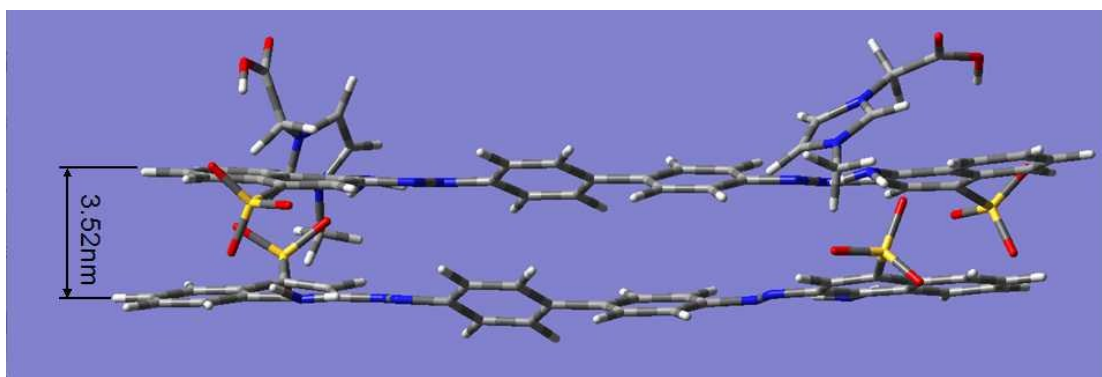

**Fig. S16**  $\omega$ B97X-D/6-31G(d,p) optimized geometry of dimer (C2) between CRs and two counters.

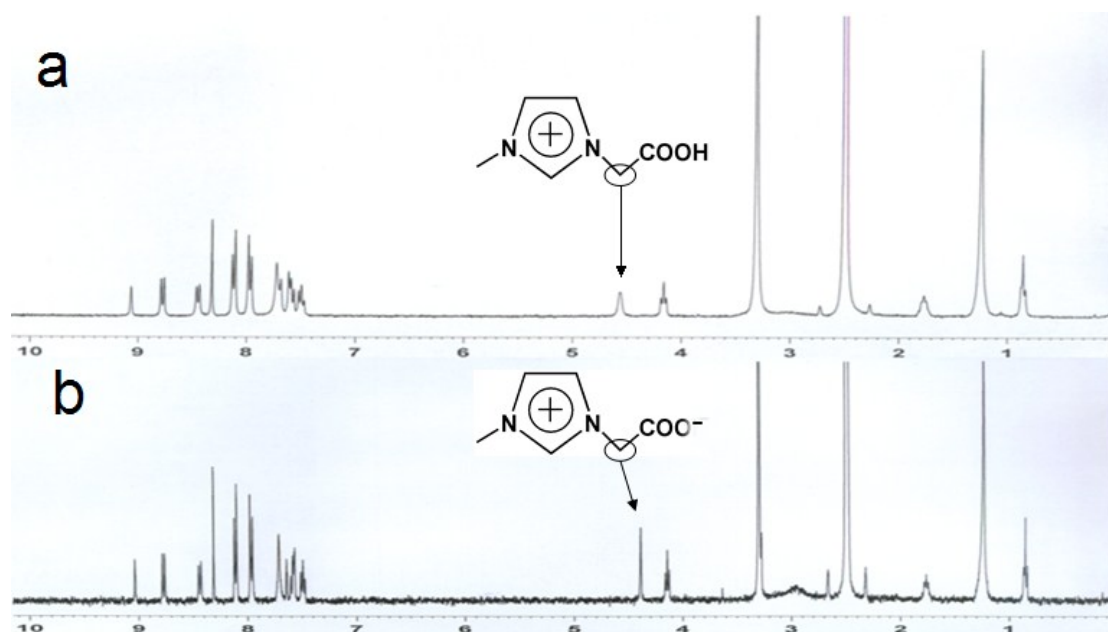

**Fig. S17**  $^1\text{H}$  NMR spectra of CR/[N-C<sub>10</sub>, N'-COOH-Im] Br supramolecular structures (molar ratio=1:2) at room temperature in the aqueous solution at pH 5.8(a) and pH 9.0 (b).

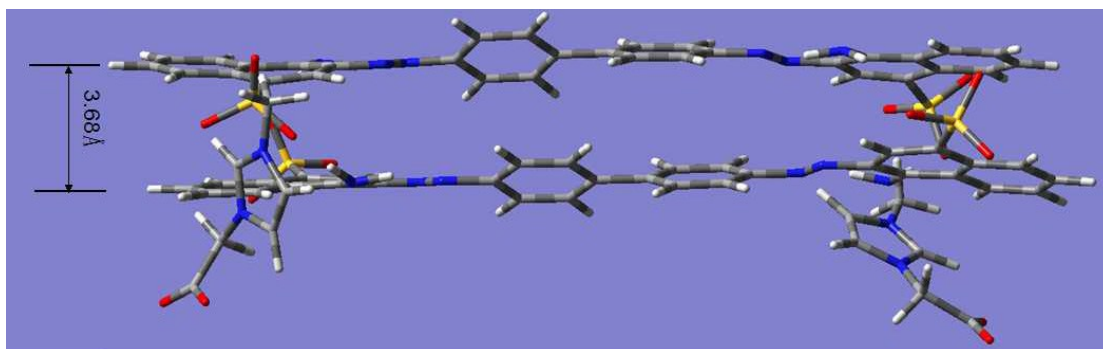

**Fig. S18**  $\omega$ B97X-D/6-31G(d,p) optimized geometry of dimer (C2) between CRs and two counters in pH=9.0

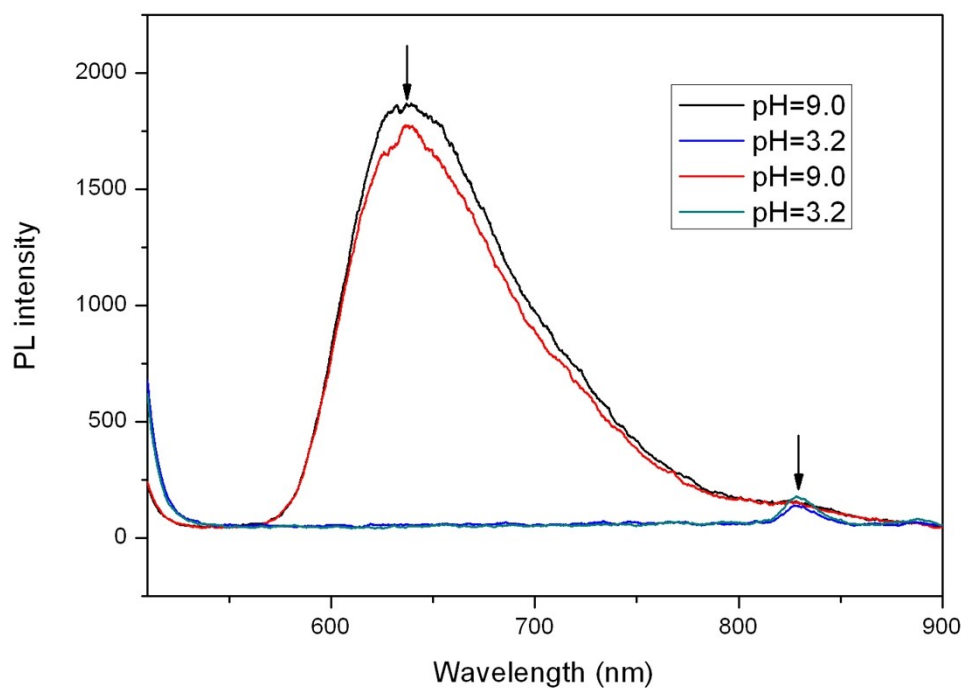

**Fig. S19** pH-dependent fluorescence spectra of CR/[N-C<sub>10</sub>, N'-COOH-Im]Br complex at pH=3.2 and 9.0.

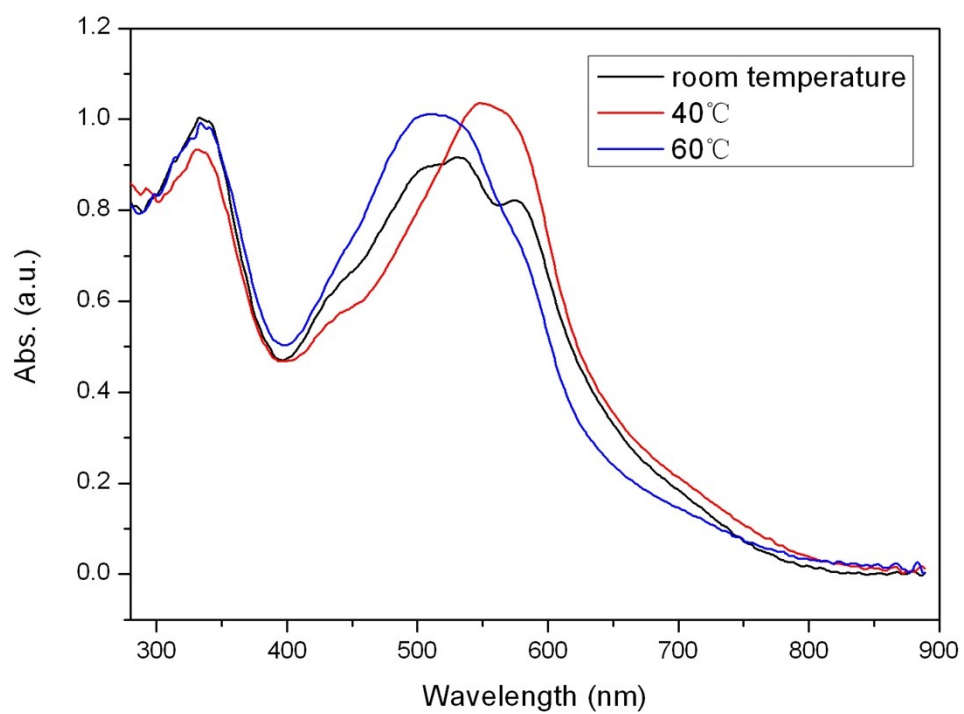

**Fig. S20** Temperature-dependent UV-Vis spectra of CR/[N-C<sub>10</sub>, N'-COOH-Im]Br complex (molar ratio=1:2) in aqueous solution at pH 3.2.
